# Supplementary material
Source: Research Square preprint supplement (doi:10.21203/rs.3.rs-9349103/v1)
Supplement: Supplementary file 1 [file c94545a38224deb503b9f43a.docx]

**SHORT ABSTRACT (TOC)**

Dietary exposure to zinc oxide nanoparticles (ZnO NPs) increased labile zinc levels in *Tribolium castaneum*, triggering an oxidative cascade and subsequent alterations in metabolic, digestive, and neurochemical biomarkers. Integrated analyses revealed a concentration-dependent divergence and transient reorganization of the biochemical network, indicating that ZnO NPs induce systemic physiological responses in a terrestrial non-target insect.
